# Supplementary material
Source: Springer Nature journal article supplement (https://www.springermedizin.de/resource/supplementary/12885_2012_3451_MOESM1_ESM.pdf/9463324)
Supplement: MOESM1 [file 9463324]

## Supplementary Table.

## Antibodies used

| <b>Antibody (clone)</b>           | <b>Host</b> | <b>Company</b>                                                | <b>Dilution</b> |
|-----------------------------------|-------------|---------------------------------------------------------------|-----------------|
| <b><i>Western Blot</i></b>        |             |                                                               |                 |
| $\alpha$ -smooth muscle actin     | rabbit      | GeneTex, Labinova, Upplands-Väsby, Sweden                     | 1:1000          |
| ABCG2 (BXP-21)                    | mouse       | Abcam, Cambridge, UK                                          | 1:1000          |
| ATP5B                             | rabbit      | Sigma-Aldrich, Stockholm, Sweden                              | 1:1000          |
| CD44                              | rabbit      | Sigma-Aldrich                                                 | 1:1000          |
| c-kit (Y145)                      | rabbit      | Abcam                                                         | 1:1000          |
| E-Cadherin (36)                   | mouse       | BD Transduction Laboratories, Erembodegem, Belgium            | 1:5000          |
| EpCAM (B302(323/A3)               | mouse       | Abcam                                                         | 1:200           |
| GAPDH                             | rabbit      | Abcam                                                         | 1:2000          |
| Integrin $\beta$ 3 (PM6/13)       | mouse       | Abcam                                                         | 1:1000          |
| mtTFA                             | rabbit      | Abcam                                                         | 1:500           |
| Nanog                             | rabbit      | Abcam                                                         | 1:300           |
| Oct-3/4 (H-134)                   | rabbit      | Santa Cruz Biotechnology                                      | 1:400           |
| PDGF receptor $\beta$ (28E1)      | rabbit      | Cell Signaling Technology, In Vitro Sweden, Stockholm, Sweden | 1:1000          |
| Vimentin (V9)                     | mouse       | Sigma-Aldrich                                                 | 1:10 000        |
|                                   |             |                                                               |                 |
| Anti-mouse-HRP                    | sheep       | GE Healthcare, Stockholm, Sweden                              | 1:5000          |
| Anti-rabbit-HRP                   | donkey      | Abcam                                                         | 1:2500          |
|                                   |             |                                                               |                 |
| <b><i>Immunoprecipitation</i></b> |             |                                                               |                 |
| Oct-4 (9B7)                       | mouse       | Cell Signaling Technology                                     | 1:100           |
| SUMO-1 (D-11)                     | mouse       | Santa Cruz Biotechnology                                      | 1:125           |
